# Supplementary material for: Historic air pollution exposure and long-term mortality risks in England and Wales: prospective longitudinal cohort study
Source: PubMed Central journal article supplement (PMC4819629; doi:10.1136/thoraxjnl-2015-207111), 2016-02-09
Supplement: thoraxjnl-2015-207111-s1.pdf [file thoraxjnl-2015-207111-s1.pdf]

**Supplemental information:****Appendix A: General Information****Table A1: International Classification of Disease (ICD) codes used for outcomes:**

|                                                                           | ICD-8                                  | ICD-9                                  | ICD-10                                              |
|---------------------------------------------------------------------------|----------------------------------------|----------------------------------------|-----------------------------------------------------|
| All-cause mortality excluding accidents<br>(all codes excluding:)         | 800 to 999                             | 800 to 999                             | Chapter V<br>Chapter W<br>Chapter X<br>Y00 to Y98.9 |
| Cardiovascular mortality                                                  | 393 to 458<br>782                      | 390 to 459<br>671 to 673               | Chapter I                                           |
| Cardiovascular mortality:<br>Coronary heart disease (CHD)                 | 410 to 424                             | 410 to 414.9                           | I20 to I25.9                                        |
| Cardiovascular mortality:<br>Stroke                                       | 430 to 438                             | 430 to 439.9                           | I60 to I63.9<br>G46.3<br>G46.4                      |
| Respiratory mortality (excludes lung cancer)                              | 460 to 493<br>516<br>518<br>783        | 460 to 519.9                           | Chapter J                                           |
| Respiratory mortality:<br>Respiratory Infections                          | 460 to 466<br>470 to 474<br>480 to 486 | 460 to 466<br>470 to 478<br>480 to 488 | J00 to J06<br>J09 to J18<br>J20 to J22              |
| Respiratory mortality: Chronic<br>Obstructive Pulmonary Disease<br>(COPD) | 491 to 492<br>518                      | 490 to 492<br>494<br>496               | J40 to J44<br>J47                                   |
| Lung cancer                                                               | 162                                    | 162                                    | C34, C33                                            |

**Table A2: Comparison of included and excluded**

|                                                                                                   | <b>Included<br/>n=367,658</b> | <b>Excluded<br/>n=154,312</b> | <b>χ<sup>2</sup></b> |
|---------------------------------------------------------------------------------------------------|-------------------------------|-------------------------------|----------------------|
|                                                                                                   | <b>Mean(SD)</b>               |                               |                      |
| Age in 1971                                                                                       | 38 (22.9)                     | 24.7 (19)                     | <b>0.000</b>         |
| <b>Gender</b>                                                                                     | <b>n(%)</b>                   | <b>n(%)</b>                   |                      |
| Males                                                                                             | 175,532 (47.7)                | 53,428 (54.1)                 | <b>0.000</b>         |
| Females                                                                                           | 192,126 (52.3)                | 45,355 (45.9)                 |                      |
| <b>Region 1991<sup>1</sup></b>                                                                    |                               |                               |                      |
| Northern                                                                                          | 18,313 (5.0)                  | 2,063 (2.1)                   | <b>0.000</b>         |
| Yorkshire/Humber                                                                                  | 28,462 (7.7)                  | 3,840 (3.9)                   |                      |
| North West                                                                                        | 35,086 (9.5)                  | 5,440 (5.5)                   |                      |
| East Midlands                                                                                     | 22,791 (6.2)                  | 3,198 (3.2)                   |                      |
| West Midlands                                                                                     | 25,146 (6.8)                  | 4,664 (4.7)                   |                      |
| East Anglia                                                                                       | 11,605 (3.2)                  | 1,561 (1.6)                   |                      |
| South East                                                                                        | 55,335 (15.1)                 | 10,042 (10.1)                 |                      |
| South West                                                                                        | 26,248 (7.1)                  | 3,905 (4.0)                   |                      |
| Wales                                                                                             | 16,442 (4.5)                  | 2,190 (2.2)                   |                      |
| Inner London                                                                                      | 7,742 (2.1)                   | 4,294 (4.4)                   |                      |
| Outer London                                                                                      | 18,743 (5.1)                  | 5,845 (5.9)                   |                      |
| <i>Missing region in 1991</i>                                                                     | <i>101,742 (27.67)</i>        | <i>51,739 (52.38)</i>         |                      |
| <b>Individual-level social class 1981<sup>2</sup> (Registrar General occupational categories)</b> |                               |                               |                      |
| I Professional                                                                                    | 6,597 (2.12)                  | 1,427 (2.3)                   | <b>0.000</b>         |
| II Intermediate                                                                                   | 40,848 (13.1)                 | 7,447 (12.2)                  |                      |
| III(N) Skilled non-manual                                                                         | 44,511 (14.3)                 | 6,834 (11.2)                  |                      |
| III(M) Skilled manual                                                                             | 50,034 (16.0)                 | 8,891 (14.5)                  |                      |
| IV Semi-skilled manual                                                                            | 36,441 (11.7)                 | 7,244 (11.8)                  |                      |
| V Unskilled manual                                                                                | 12,432 (4.0)                  | 2,673 (4.4)                   |                      |
| Armed forces & inadequately described                                                             | 16,335 (5.0)                  | 635 (1.04)                    |                      |
| Other economically inactive/student/childcare/<br>Retired/permanently sick                        | 74,793 (24.0)                 | 14,698 (24.0)                 |                      |
| Missing                                                                                           | 29,893 (9.6)                  | 11,465 (18.7)                 |                      |
| <b>Area-level deprivation 1971 (Carstairs quintile)</b>                                           |                               |                               |                      |
| 1 (least deprived)                                                                                | 69,608 (19.0)                 | 20,699 (21.0)                 | <b>0.000</b>         |
| 2                                                                                                 | 74,140 (20.2)                 | 18,421 (18.7)                 |                      |
| 3                                                                                                 | 75,428 (20.6)                 | 18,149 (18.4)                 |                      |
| 4                                                                                                 | 75,511 (20.6)                 | 18,315 (18.6)                 |                      |
| 5 (most deprived)                                                                                 | 72,202 (19.7)                 | 22,945 (23.3)                 |                      |
| <b>Moved in the 5 year migration 1966-71</b>                                                      |                               |                               |                      |
| Movers                                                                                            | 144,596 (39.33)               | 58,236 (59.0)                 | <b>0.000</b>         |
| Non-movers                                                                                        | 223,055 (60.7)                | 40,547 (41.1)                 |                      |

<sup>1</sup>Those without region information at 1971 were excluded. <sup>2</sup>Those without social class information at 1971 were excluded. Source: ONS Longitudinal Study (Authors' own work).

**Table A3: Air pollution levels in  $\mu\text{g}/\text{m}^3$  by social class and area-level deprivation and by geographical region**

|                                                                           | BS 1971          | BS 1981          | BS 1991          | SO <sub>2</sub><br>1971 | SO <sub>2</sub><br>1981 | SO <sub>2</sub><br>1991 | PM <sub>10</sub><br>2001 |
|---------------------------------------------------------------------------|------------------|------------------|------------------|-------------------------|-------------------------|-------------------------|--------------------------|
|                                                                           | <b>Mean</b>      |                  |                  |                         |                         |                         |                          |
| <b>Individual social class based on occupation</b>                        | <b>1971</b>      | <b>1981</b>      | <b>1991</b>      | <b>1971</b>             | <b>1981</b>             | <b>1991</b>             | <b>2001</b>              |
| I Professional                                                            | 39.0             | 15.7             | 11.6             | 81.7                    | 42.6                    | 28.9                    | 20.7                     |
| II Intermediate                                                           | 39.2             | 15.6             | 11.6             | 79.6                    | 42.1                    | 29.0                    | 20.5                     |
| III(N) Skilled non-manual                                                 | 42.5             | 16.3             | 11.8             | 88.8                    | 44.1                    | 29.4                    | 20.7                     |
| III(M) Skilled manual                                                     | 44.5             | 16.7             | 12.1             | 86.8                    | 43.7                    | 30.0                    | 20.6                     |
| IV Partly skilled manual                                                  | 44.1             | 16.7             | 12.2             | 87.0                    | 43.6                    | 30.1                    | 20.6                     |
| V Unskilled manual                                                        | 46.6             | 16.9             | 12.1             | 91.7                    | 44.3                    | 30.1                    | 20.7                     |
| Armed forces & inadequately described                                     | 41.7             | 13.2             | 9.3              | 85.0                    | 36.8                    | 25.8                    | 20.0                     |
| Other economically inactive/student/childcare/Retired or permanently sick | 44.1             | 16.2             | 11.6             | 84.4                    | 44                      | 29.3                    | 20.6                     |
| <i>Analysis of Variance</i>                                               | <b>&lt;0.001</b> | <b>&lt;0.001</b> | <b>&lt;0.001</b> | <b>&lt;0.001</b>        | <b>&lt;0.001</b>        | <b>&lt;0.001</b>        | <b>&lt;0.001</b>         |
| <i>Test for trend (nptrend)</i>                                           | <b>&lt;0.001</b> | 0.068            | <b>&lt;0.001</b> | <b>&lt;0.001</b>        | <b>&lt;0.001</b>        | <b>0.010</b>            | <b>&lt;0.001</b>         |
| <b>Area-level deprivation (Carstairs quintiles)</b>                       | <b>1971</b>      | <b>1981</b>      | <b>1991</b>      | <b>1971</b>             | <b>1981</b>             | <b>1991</b>             | <b>2001</b>              |
| 1 (least deprived)                                                        | 33.9             | 14.4             | 11.3             | 74.9                    | 39.6                    | 27.7                    | 19.6                     |
| 2                                                                         | 38.2             | 14.8             | 11.0             | 81.5                    | 39.4                    | 28.1                    | 20.2                     |
| 3                                                                         | 40.6             | 15.8             | 11.4             | 82.1                    | 41.5                    | 29.2                    | 20.6                     |
| 4                                                                         | 45.9             | 17.5             | 12.4             | 88.7                    | 45.4                    | 30.9                    | 21.0                     |
| 5 (most deprived)                                                         | 54.9             | 19.0             | 13.3             | 99.0                    | 50.6                    | 32.6                    | 22.5                     |
| <i>Analysis of Variance</i>                                               | <b>&lt;0.001</b> | <b>&lt;0.001</b> | <b>&lt;0.001</b> | <b>&lt;0.001</b>        | <b>&lt;0.001</b>        | <b>&lt;0.001</b>        | <b>&lt;0.001</b>         |
| <i>Test for trend (nptrend)</i>                                           | <b>&lt;0.001</b> | <b>&lt;0.001</b> | <b>&lt;0.001</b> | <b>&lt;0.001</b>        | <b>&lt;0.001</b>        | <b>&lt;0.001</b>        | <b>&lt;0.001</b>         |
| <b>Geographical region</b>                                                | <b>1971</b>      | <b>1981</b>      | <b>1991</b>      | <b>1971</b>             | <b>1981</b>             | <b>1991</b>             | <b>2001</b>              |
| Northern                                                                  | 65.8             | 19.2             | 15.2             | 89.1                    | 40.6                    | 32.0                    | 20.5                     |
| Yorkshire/Humberside                                                      | 61.6             | 21.1             | 16.6             | 100.4                   | 49.5                    | 36.3                    | 20.3                     |
| North West                                                                | 62.8             | 19.4             | 15.6             | 102.3                   | 45.9                    | 35.2                    | 21.4                     |
| East Midlands                                                             | 47.5             | 19.5             | 16.2             | 84.7                    | 47.0                    | 33.4                    | 19.7                     |
| West Midlands                                                             | 48.9             | 17.5             | 13.8             | 95.9                    | 46.8                    | 32.3                    | 20.0                     |
| East Anglia                                                               | 26.1             | 13.0             | 10.3             | 59.9                    | 37.3                    | 29.6                    | 20.4                     |
| South East                                                                | 24.7             | 13.4             | 9.4              | 62.2                    | 38.6                    | 23.8                    | 20.3                     |
| South West                                                                | 19.0             | 10.1             | 4.5              | 44.1                    | 28.6                    | 21.2                    | 19.6                     |
| Wales                                                                     | 22.4             | 10.2             | 5.7              | 44.5                    | 28.2                    | 25.9                    | 12.2                     |
| Inner London                                                              | 45.6             | 17.0             | 10.5             | 150.8                   | 65.3                    | 28.5                    | 27.3                     |
| Outer London                                                              | 37.7             | 16.6             | 10.8             | 115.6                   | 56.3                    | 30.2                    | 24.4                     |
| <i>Analysis of Variance</i>                                               | <b>&lt;0.001</b> | <b>&lt;0.001</b> | <b>&lt;0.001</b> | <b>&lt;0.001</b>        | <b>&lt;0.001</b>        | <b>&lt;0.001</b>        | <b>&lt;0.001</b>         |

Source: ONS Longitudinal Study (Authors' own work)

## Appendix B: Supplemental BS and PM<sub>10</sub> results

**Table B1: Logistic regression odds ratios (95% CI) per 10 µg/m<sup>3</sup> for BS exposure in 1981 and 1991 and mortality in subsequent decades shown in main paper in Figure 2**

| Decade of outcome                                             | i) Unadjusted (age and sex only) | ii) Adjusted (age, sex, social class, area-level deprivation, region, pop density) | Sensitivity analysis: Adjusted (age, sex, social class, area-level deprivation, region, pop density & lung cancer) |
|---------------------------------------------------------------|----------------------------------|------------------------------------------------------------------------------------|--------------------------------------------------------------------------------------------------------------------|
| <b>Additional outcomes – Exposure in 1971</b>                 |                                  |                                                                                    |                                                                                                                    |
| <b>Cardiovascular mortality: Coronary heart disease (CHD)</b> |                                  |                                                                                    |                                                                                                                    |
| 1972-2009                                                     | 1.10 [1.09;1.11]                 | 1.03 [1.01;1.05]                                                                   | -                                                                                                                  |
| 1972-1981                                                     | 1.11 [1.09;1.13]                 | 1.03 [0.98;1.08]                                                                   | -                                                                                                                  |
| 1982-1991                                                     | 1.12 [1.10;1.13]                 | 1.04 [1.01;1.08]                                                                   | -                                                                                                                  |
| 1992-2001                                                     | 1.09 [1.07;1.10]                 | 1.03 [1.00;1.06]                                                                   | -                                                                                                                  |
| 2002-2009                                                     | 1.07 [1.05;1.08]                 | 1.02 [0.98;1.05]                                                                   | 1.01 [0.99;1.02]                                                                                                   |
| <b>Cardiovascular mortality: Stroke</b>                       |                                  |                                                                                    |                                                                                                                    |
| 1972-2009                                                     | 1.08 [1.06;1.09]                 | 1.05 [1.02;1.09]                                                                   | -                                                                                                                  |
| 1972-1981                                                     | 1.12 [1.09;1.16]                 | 1.05 [0.98;1.13]                                                                   | -                                                                                                                  |
| 1982-1991                                                     | 1.09 [1.06;1.11]                 | 1.03 [0.98;1.09]                                                                   | -                                                                                                                  |
| 1992-2001                                                     | 1.06 [1.04;1.08]                 | 1.06 [1.02;1.11]                                                                   | -                                                                                                                  |
| 2002-2009                                                     | 1.02 [0.99;1.06]                 | 1.03 [0.95;1.12]                                                                   | 1.03 [0.94;1.12]                                                                                                   |
| <b>Respiratory mortality: Respiratory Infections</b>          |                                  |                                                                                    |                                                                                                                    |
| 1972-2009                                                     | 1.08 [1.06;1.09]                 | 1.06 [1.02;1.11]                                                                   | -                                                                                                                  |
| 1972-1981                                                     | 1.10 [1.06;1.15]                 | 1.12 [1.01;1.23]                                                                   | -                                                                                                                  |
| 1982-1991                                                     | 1.10 [1.06;1.15]                 | 1.02 [0.92;1.14]                                                                   | -                                                                                                                  |
| 1992-2001                                                     | 1.08 [1.05;1.10]                 | 1.07 [1.02;1.13]                                                                   | -                                                                                                                  |
| 2002-2009                                                     | 1.05 [1.03;1.08]                 | 1.04 [0.98;1.10]                                                                   | 1.02 [0.96;1.08]                                                                                                   |
| <b>Respiratory mortality: COPD</b>                            |                                  |                                                                                    |                                                                                                                    |
| 1972-2009                                                     | 1.14 [1.12;1.16]                 | 1.07 [1.03;1.11]                                                                   | -                                                                                                                  |
| 1972-1981                                                     | 1.18 [1.12;1.23]                 | 1.12 [1.00;1.25]                                                                   | -                                                                                                                  |
| 1982-1991                                                     | 1.16 [1.12;1.20]                 | 1.02 [0.95;1.10]                                                                   | -                                                                                                                  |
| 1992-2001                                                     | 1.14 [1.11;1.16]                 | 1.09 [1.03;1.15]                                                                   | -                                                                                                                  |
| 2002-2009                                                     | 1.12 [1.09;1.14]                 | 1.08 [1.02;1.14]                                                                   | 1.06 [1.00;1.13]                                                                                                   |
| <b>Lung cancer mortality</b>                                  |                                  |                                                                                    |                                                                                                                    |
| 1972-2009                                                     | 1.13 [1.12;1.15]                 | 1.05 [1.02;1.09]                                                                   | -                                                                                                                  |
| 1972-1981                                                     | 1.16 [1.12;1.19]                 | 1.08 [1.00;1.16]                                                                   | -                                                                                                                  |
| 1982-1991                                                     | 1.15 [1.13;1.18]                 | 1.09 [1.04;1.15]                                                                   | -                                                                                                                  |
| 1992-2001                                                     | 1.13 [1.10;1.15]                 | 1.04 [0.99;1.09]                                                                   | -                                                                                                                  |
| 2002-2009                                                     | 1.11 [1.08;1.13]                 | 1.04 [0.99;1.09]                                                                   | -                                                                                                                  |
| <b>Exposure in 1981</b>                                       |                                  |                                                                                    |                                                                                                                    |
| <b>All-cause mortality excluding accidents</b>                |                                  |                                                                                    |                                                                                                                    |
| 1982-2009                                                     | 1.23 [1.20;1.26]                 | 1.11 [1.08;1.15]                                                                   | -                                                                                                                  |
| 1982-1991                                                     | 1.31 [1.26;1.36]                 | 1.12 [1.06;1.18]                                                                   | -                                                                                                                  |
| 1992-2001                                                     | 1.25 [1.21;1.28]                 | 1.13 [1.08;1.18]                                                                   | -                                                                                                                  |
| 2002-2009                                                     | 1.18 [1.14;1.21]                 | 1.09 [1.04;1.13]                                                                   | 1.09 [1.04;1.13]                                                                                                   |
| <b>Cardiovascular mortality</b>                               |                                  |                                                                                    |                                                                                                                    |
| 1982-2009                                                     | 1.26 [1.22;1.30]                 | 1.12 [1.07;1.17]                                                                   | -                                                                                                                  |
| 1982-1991                                                     | 1.34 [1.27;1.41]                 | 1.13 [1.05;1.22]                                                                   | -                                                                                                                  |
| 1992-2001                                                     | 1.28 [1.22;1.33]                 | 1.18 [1.11;1.25]                                                                   | -                                                                                                                  |
| 2002-2009                                                     | 1.17 [1.12;1.22]                 | 1.07 [1.01;1.14]                                                                   | 1.07 [1.01;1.14]                                                                                                   |
| <b>Cardiovascular mortality: Coronary heart disease (CHD)</b> |                                  |                                                                                    |                                                                                                                    |
| 1982-2009                                                     | 1.32 [1.27;1.36]                 | 1.13 [1.08;1.20]                                                                   | -                                                                                                                  |
| 1982-1991                                                     | 1.37 [1.29;1.46]                 | 1.16 [1.06;1.26]                                                                   | -                                                                                                                  |
| 1992-2001                                                     | 1.32 [1.25;1.39]                 | 1.17 [1.09;1.26]                                                                   | -                                                                                                                  |

|                                                               |                  |                  |                  |
|---------------------------------------------------------------|------------------|------------------|------------------|
| 2002-2009                                                     | 1.22 [1.16;1.29] | 1.04 [1.01;1.08] | 1.1 [1.01;1.19]  |
| <b>Cardiovascular mortality: Stroke</b>                       |                  |                  |                  |
| 1982-2009                                                     | 1.24 [1.16;1.31] | 1.15 [1.06;1.26] | -                |
| 1982-1991                                                     | 1.28 [1.17;1.41] | 1.11 [0.97;1.28] | -                |
| 1992-2001                                                     | 1.25 [1.16;1.35] | 1.22 [1.09;1.36] | -                |
| 2002-2009                                                     | 1.09 [0.95;1.25] | 1.09 [0.89;1.33] | 1.08 [0.88;1.33] |
| <b>Respiratory mortality</b>                                  |                  |                  |                  |
| 1982-2009                                                     | 1.37 [1.31;1.44] | 1.20 [1.12;1.28] | -                |
| 1982-1991                                                     | 1.52 [1.38;1.68] | 1.28 [1.10;1.47] | -                |
| 1992-2001                                                     | 1.35 [1.26;1.44] | 1.19 [1.08;1.30] | -                |
| 2002-2009                                                     | 1.30 [1.22;1.39] | 1.18 [1.08;1.29] | 1.17 [1.06;1.29] |
| <b>Respiratory mortality – Infectious disease</b>             |                  |                  |                  |
| 1982-2009                                                     | 1.25 [1.17;1.34] | 1.13 [1.03;1.25] | -                |
| 1982-1991                                                     | 1.36 [1.15;1.61] | 1.14 [0.89;1.46] | -                |
| 1992-2001                                                     | 1.30 [1.19;1.42] | 1.19 [1.04;1.35] | -                |
| 2002-2009                                                     | 1.15 [1.05;1.27] | 1.10 [0.96;1.27] | 1.08 [0.93;1.24] |
| <b>Respiratory mortality - COPD</b>                           |                  |                  |                  |
| 1982-2009                                                     | 1.52 [1.42;1.61] | 1.34 [1.22;1.47] | -                |
| 1982-1991                                                     | 1.61 [1.42;1.82] | 1.32 [1.11;1.59] | -                |
| 1992-2001                                                     | 1.49 [1.35;1.63] | 1.30 [1.13;1.48] | -                |
| 2002-2009                                                     | 1.48 [1.34;1.63] | 1.39 [1.21;1.60] | 1.41 [1.22;1.62] |
| <b>Lung cancer mortality</b>                                  |                  |                  |                  |
| 1982-2009                                                     | 1.44 [1.37;1.52] | 1.16 [1.08;1.25] | -                |
| 1982-1991                                                     | 1.55 [1.42;1.70] | 1.21 [1.06;1.38] | -                |
| 1992-2001                                                     | 1.42 [1.31;1.54] | 1.15 [1.02;1.29] | -                |
| 2002-2009                                                     | 1.37 [1.25;1.49] | 1.12 [0.99;1.27] | -                |
| <b>Exposure in 1991</b>                                       |                  |                  |                  |
| <b>All-cause mortality excluding accidents</b>                |                  |                  |                  |
| 1992-1991                                                     | 1.18 [1.15;1.21] | 1.13 [1.08;1.18] | -                |
| 1992-2001                                                     | 1.22 [1.18;1.26] | 1.17 [1.11;1.24] | -                |
| 2002-2009                                                     | 1.15 [1.11;1.18] | 1.10 [1.05;1.16] | 1.10 [1.04;1.16] |
| <b>Cardiovascular mortality</b>                               |                  |                  |                  |
| 1992-1991                                                     | 1.22 [1.18;1.27] | 1.18 [1.11;1.25] | -                |
| 1992-2001                                                     | 1.29 [1.23;1.35] | 1.26 [1.16;1.36] | -                |
| 2002-2009                                                     | 1.15 [1.09;1.10] | 1.11 [1.03;1.20] | 1.11 [1.02;1.20] |
| <b>Cardiovascular mortality: Coronary heart disease (CHD)</b> |                  |                  |                  |
| 1992-1991                                                     | 1.30 [1.25;1.37] | 1.21 [1.13;1.31] | -                |
| 1992-2001                                                     | 1.36 [1.29;1.44] | 1.29 [1.17;1.42] | -                |
| 2002-2009                                                     | 1.22 [1.14;1.30] | 1.14 [1.03;1.27] | 1.14 [1.02;1.27] |
| <b>Cardiovascular mortality: Stroke</b>                       |                  |                  |                  |
| 1992-1991                                                     | 1.22 [1.13;1.32] | 1.27 [1.12;1.44] | -                |
| 1992-2001                                                     | 1.27 [1.17;1.39] | 1.32 [1.14;1.53] | -                |
| 2002-2009                                                     | 1.05 [0.90;1.23] | 1.13 [0.88;1.46] | 1.10 [0.85;1.43] |
| <b>Respiratory mortality</b>                                  |                  |                  |                  |
| 1992-1991                                                     | 1.29 [1.22;1.36] | 1.28 [1.16;1.41] | -                |
| 1992-2001                                                     | 1.31 [1.21;1.41] | 1.38 [1.22;1.57] | -                |
| 2002-2009                                                     | 1.26 [1.17;1.35] | 1.19 [1.06;1.35] | 1.17 [1.03;1.33] |
| <b>Respiratory mortality – Infectious disease</b>             |                  |                  |                  |
| 1992-2009                                                     | 1.19 [1.10;1.28] | 1.19 [1.04;1.36] | -                |
| 1992-2001                                                     | 1.24 [1.12;1.37] | 1.31 [1.10;1.55] | -                |
| 2002-2009                                                     | 1.12 [1.00;1.24] | 1.09 [0.91;1.30] | 1.06 [0.88;1.28] |
| <b>Respiratory mortality - COPD</b>                           |                  |                  |                  |
| 1992-2009                                                     | 1.39 [1.29;1.51] | 1.44 [1.26;1.65] | -                |
| 1992-2001                                                     | 1.43 [1.28;1.59] | 1.53 [1.27;1.83] | -                |

|                              |                         |                         |                         |
|------------------------------|-------------------------|-------------------------|-------------------------|
| 2002-2009                    | <b>1.36 [1.21;1.51]</b> | <b>1.36 [1.13;1.64]</b> | <b>1.35 [1.11;1.63]</b> |
| <b>Lung cancer mortality</b> |                         |                         |                         |
| 1992-2009                    | <b>1.38 [1.29;1.48]</b> | <b>1.22 [1.09;1.37]</b> | -                       |
| 1992-2001                    | <b>1.38 [1.26;1.51]</b> | <b>1.16 [1.00;1.36]</b> | -                       |
| 2002-2009                    | <b>1.39 [1.26;1.54]</b> | <b>1.31 [1.10;1.55]</b> | -                       |

Source: ONS Longitudinal Study (Authors' own work)

**Table B2: Sensitivity analyses for logistic regression odds ratios (95% CI) per 10 µg/m<sup>3</sup> for BS exposure in 1971 and mortality in subsequent decades**

| Decade of outcome                              | i) Unadjusted (age and sex only) | ii) Adjusted (age, sex, social class, area-level deprivation, region, pop density) | Adjusted (age, sex, social class, area-level deprivation, region, pop density & lung cancer) | Adjusted (age, sex, social class, area-level deprivation, region, pop density) - non-movers | Adjusted (age, sex, social class, area-level deprivation, region, pop density and later exposures <sup>1</sup> ) |
|------------------------------------------------|----------------------------------|------------------------------------------------------------------------------------|----------------------------------------------------------------------------------------------|---------------------------------------------------------------------------------------------|------------------------------------------------------------------------------------------------------------------|
| <b>All-cause mortality excluding accidents</b> |                                  |                                                                                    |                                                                                              |                                                                                             |                                                                                                                  |
| 1972-2009                                      | <b>1.07 [1.07;1.08]</b>          | <b>1.03 [1.02;1.05]</b>                                                            |                                                                                              | <b>1.03 [1.01;1.05]</b>                                                                     |                                                                                                                  |
| 1972-1981                                      | <b>1.10 [1.08;1.11]</b>          | <b>1.05 [1.02;1.08]</b>                                                            |                                                                                              | <b>1.06 [1.02;1.09]</b>                                                                     |                                                                                                                  |
| 1982-1991                                      | <b>1.09 [1.08;1.10]</b>          | <b>1.03 [1.01;1.06]</b>                                                            |                                                                                              | <b>1.03 [1.00;1.06]</b>                                                                     |                                                                                                                  |
| 1992-2001                                      | <b>1.07 [1.07;1.08]</b>          | <b>1.04 [1.02;1.06]</b>                                                            |                                                                                              | <b>1.04 [1.02;1.07]</b>                                                                     | 1.01 [0.99;1.03]                                                                                                 |
| 2002-2009                                      | <b>1.05 [1.05;1.06]</b>          | <b>1.02 [1.01;1.04]</b>                                                            | <b>1.02 [1.0;1.04]</b>                                                                       | <b>1.02 [1.00;1.04]</b>                                                                     | <b>1.01 [1.00;1.03]</b>                                                                                          |
| <b>Cardiovascular mortality</b>                |                                  |                                                                                    |                                                                                              |                                                                                             |                                                                                                                  |
| 1972-2009                                      | <b>1.08 [1.07;1.09]</b>          | <b>1.03 [1.01;1.05]</b>                                                            |                                                                                              | <b>1.03 [1.01;1.05]</b>                                                                     |                                                                                                                  |
| 1972-1981                                      | <b>1.11 [1.09;1.13]</b>          | 1.03 [0.99;1.08]                                                                   |                                                                                              | 1.04 [0.99;1.09]                                                                            |                                                                                                                  |
| 1982-1991                                      | <b>1.10 [1.09;1.12]</b>          | <b>1.04 [1.01;1.07]</b>                                                            |                                                                                              | <b>1.04 [1.00;1.08]</b>                                                                     |                                                                                                                  |
| 1992-2001                                      | <b>1.08 [1.07;1.09]</b>          | <b>1.04 [1.01;1.07]</b>                                                            |                                                                                              | <b>1.04 [1.01;1.08]</b>                                                                     | 1.00 [0.97;1.03]                                                                                                 |
| 2002-2009                                      | <b>1.05 [1.04;1.06]</b>          | 1.01 [0.98;1.04]                                                                   | 1.01 [0.98;1.03]                                                                             | 1.01 [0.98;1.04]                                                                            | 0.99 [0.97;1.03]                                                                                                 |
| <b>Respiratory mortality</b>                   |                                  |                                                                                    |                                                                                              |                                                                                             |                                                                                                                  |
| 1972-2009                                      | <b>1.11 [1.10;1.12]</b>          | <b>1.07 [1.04;1.10]</b>                                                            |                                                                                              | <b>1.06 [1.02;1.09]</b>                                                                     |                                                                                                                  |
| 1972-1981                                      | <b>1.12 [1.09;1.16]</b>          | <b>1.10 [1.02;1.18]</b>                                                            |                                                                                              | <b>1.14 [1.04;1.24]</b>                                                                     |                                                                                                                  |
| 1982-1991                                      | <b>1.14 [1.12;1.17]</b>          | 1.05 [0.99;1.12]                                                                   |                                                                                              | 1.04 [0.97;1.12]                                                                            |                                                                                                                  |
| 1992-2001                                      | <b>1.10 [1.08;1.12]</b>          | <b>1.08 [1.04;1.13]</b>                                                            |                                                                                              | <b>1.07 [1.02;1.12]</b>                                                                     | <b>1.04 [1.00;1.09]</b>                                                                                          |
| 2002-2009                                      | <b>1.09 [1.07;1.11]</b>          | <b>1.05 [1.01;1.09]</b>                                                            | 1.03 [0.99;1.08]                                                                             | 1.03 [0.99;1.08]                                                                            | 1.03 [0.98;1.07]                                                                                                 |

<sup>1</sup> BS exposure in 1981 and 1991. Source: ONS Longitudinal Study (Authors' own work)

**Table B3: Logistic regression odds ratios [95% CI] per 10 µg/m<sup>3</sup> for PM<sub>10</sub> exposure in 2001 and mortality 2002-9 adjusted for past BS and SO<sub>2</sub> exposure**

| <b>(2002-2009)</b>                                       | i) Unadjusted (age and sex only) | ii) Adjusted (age, sex, social class, area-level deprivation, region, pop density) | Sensitivity analysis: Adjusted (age, sex, social class, area-level deprivation, region, pop density & lung cancer) |
|----------------------------------------------------------|----------------------------------|------------------------------------------------------------------------------------|--------------------------------------------------------------------------------------------------------------------|
| <b>All-cause mortality excluding accidents</b>           |                                  |                                                                                    |                                                                                                                    |
| PM <sub>10</sub> 2001                                    | <b>1.37 [1.29;1.45]</b>          | <b>1.24 [1.16;1.34]</b>                                                            | <b>1.24 [1.15;1.33]</b>                                                                                            |
| PM <sub>10</sub> 2001 + SO <sub>2</sub> 1971             | <b>1.24 [1.15;1.32]</b>          | <b>1.23 [1.15;1.33]</b>                                                            | <b>1.23 [1.14;1.32]</b>                                                                                            |
| PM <sub>10</sub> 2001 + SO <sub>2</sub> 1981             | <b>1.22 [1.14;1.31]</b>          | <b>1.17 [1.08;1.26]</b>                                                            | <b>1.16 [1.08;1.26]</b>                                                                                            |
| PM <sub>10</sub> 2001 + SO <sub>2</sub> 1991             | <b>1.25 [1.17;1.33]</b>          | <b>1.18 [1.09;1.27]</b>                                                            | <b>1.17 [1.09;1.27]</b>                                                                                            |
| PM <sub>10</sub> 2001 + SO <sub>2</sub> all years        | <b>1.19 [1.11;1.29]</b>          | <b>1.14 [1.06;1.24]</b>                                                            | <b>1.14 [1.05;1.23]</b>                                                                                            |
| PM <sub>10</sub> 2001 + BS 1971 + SO <sub>2</sub> 1971   | <b>1.32 [1.23;1.41]</b>          | <b>1.24 [1.15;1.33]</b>                                                            | <b>1.23 [1.15;1.33]</b>                                                                                            |
| PM <sub>10</sub> 2001 + BS 1981 + SO <sub>2</sub> 1981   | <b>1.30 [1.21;1.40]</b>          | <b>1.18 [1.09;1.27]</b>                                                            | <b>1.18 [1.09;1.27]</b>                                                                                            |
| PM <sub>10</sub> 2001 + BS 1991 + SO <sub>2</sub> 1991   | <b>1.25 [1.18;1.34]</b>          | <b>1.19 [1.11;1.29]</b>                                                            | <b>1.19 [1.10;1.28]</b>                                                                                            |
| PM <sub>10</sub> 2001 + BS and SO <sub>2</sub> all years | <b>1.23 [1.14;1.33]</b>          | <b>1.16 [1.07;1.26]</b>                                                            | <b>1.16 [1.07;1.26]</b>                                                                                            |
| <b>Cardiovascular mortality</b>                          |                                  |                                                                                    |                                                                                                                    |
| PM <sub>10</sub> 2001                                    | <b>1.25 [1.14;1.37]</b>          | <b>1.13 [1.01;1.25]</b>                                                            | <b>1.12 [1.01;1.25]</b>                                                                                            |
| PM <sub>10</sub> 2001 + SO <sub>2</sub> 1971             | <b>1.14 [1.03;1.26]</b>          | 1.12 [0.99;1.26]                                                                   | 1.12 [1.00;1.25]                                                                                                   |
| PM <sub>10</sub> 2001 + SO <sub>2</sub> 1981             | <b>1.15 [1.03;1.27]</b>          | 1.08 [0.96;1.21]                                                                   | 1.08 [0.96;1.21]                                                                                                   |
| PM <sub>10</sub> 2001 + SO <sub>2</sub> 1991             | <b>1.14 [1.03;1.25]</b>          | 1.07 [0.96;1.22]                                                                   | 1.07 [0.95;1.20]                                                                                                   |
| PM <sub>10</sub> 2001 + SO <sub>2</sub> all years        | 1.11 [0.99;1.24]                 | 1.05 [0.93;1.18]                                                                   | 1.05 [0.93;1.18]                                                                                                   |
| PM <sub>10</sub> 2001 + BS 1971 + SO <sub>2</sub> 1971   | <b>1.22 [1.10;1.36]</b>          | 1.13 [1.01;1.26]                                                                   | <b>1.12 [1.01;1.26]</b>                                                                                            |
| PM <sub>10</sub> 2001 + BS 1981 + SO <sub>2</sub> 1981   | <b>1.24 [1.11;1.38]</b>          | 1.10 [0.97;1.23]                                                                   | 1.09 [0.97;1.23]                                                                                                   |
| PM <sub>10</sub> 2001 + BS 1991 + SO <sub>2</sub> 1991   | <b>1.15 [1.04;1.26]</b>          | 1.10 [0.98;1.23]                                                                   | 1.09 [0.98;1.23]                                                                                                   |
| PM <sub>10</sub> 2001 + BS and SO <sub>2</sub> all years | <b>1.16 [1.03;1.30]</b>          | 1.08 [0.95;1.22]                                                                   | 1.07 [0.95;1.21]                                                                                                   |
| <b>Respiratory mortality</b>                             |                                  |                                                                                    |                                                                                                                    |
| PM <sub>10</sub> 2001                                    | <b>1.55 [1.35;1.77]</b>          | <b>1.23 [1.05;1.45]</b>                                                            | <b>1.22 [1.04;1.44]</b>                                                                                            |
| PM <sub>10</sub> 2001 + SO <sub>2</sub> 1971             | <b>1.26 [1.08;1.47]</b>          | <b>1.22 [1.03;1.44]</b>                                                            | <b>1.21 [1.02;1.43]</b>                                                                                            |
| PM <sub>10</sub> 2001 + SO <sub>2</sub> 1981             | <b>1.30 [1.11;1.53]</b>          | 1.15 [0.96;1.37]                                                                   | 1.14 [0.96;1.36]                                                                                                   |
| PM <sub>10</sub> 2001 + SO <sub>2</sub> 1991             | <b>1.41 [1.22;1.62]</b>          | 1.16 [0.98;1.37]                                                                   | 1.15 [0.97;1.36]                                                                                                   |
| PM <sub>10</sub> 2001 + SO <sub>2</sub> all years        | <b>1.30 [1.09;1.54]</b>          | 1.15 [0.96;1.38]                                                                   | 1.14 [0.95;1.37]                                                                                                   |
| PM <sub>10</sub> 2001 + BS 1971 + SO <sub>2</sub> 1971   | <b>1.40 [1.19;1.65]</b>          | <b>1.24 [1.05;1.47]</b>                                                            | <b>1.23 [1.04;1.46]</b>                                                                                            |
| PM <sub>10</sub> 2001 + BS 1981 + SO <sub>2</sub> 1981   | <b>1.45 [1.23;1.71]</b>          | 1.18 [0.99;1.41]                                                                   | 1.17 [0.98;1.40]                                                                                                   |
| PM <sub>10</sub> 2001 + BS 1991 + SO <sub>2</sub> 1991   | <b>1.40 [1.21;1.62]</b>          | 1.17 [0.98;1.38]                                                                   | 1.15 [0.97;1.37]                                                                                                   |
| PM <sub>10</sub> 2001 + BS and SO <sub>2</sub> all years | <b>1.34 [1.12;1.59]</b>          | 1.19 [0.99;1.43]                                                                   | 1.18 [0.98;1.42]                                                                                                   |

Source: ONS Longitudinal Study (Authors' own work)



**Table B4: Logistic regression odds ratios [95% CI] per 10 µg/m<sup>3</sup> for PM<sub>10</sub> exposure in 2001 and subgroup analyses of mortality 2002-9**

| <b>(2002-2009)</b>                                            | <b>i) Unadjusted (age and sex only)</b> | <b>ii) Adjusted (age, sex, social class, area-level deprivation, region, pop density)</b> | <b>Sensitivity analysis: Adjusted (age, sex, social class, area-level deprivation, region, pop density &amp; lung cancer)</b> |
|---------------------------------------------------------------|-----------------------------------------|-------------------------------------------------------------------------------------------|-------------------------------------------------------------------------------------------------------------------------------|
| <b>All-cause mortality excluding accidents</b>                |                                         |                                                                                           |                                                                                                                               |
| PM <sub>10</sub> 2001                                         | <b>1.37 [1.29;1.45]</b>                 | <b>1.24 [1.16;1.34]</b>                                                                   | <b>1.24 [1.15;1.33]</b>                                                                                                       |
| <b>Cardiovascular mortality</b>                               |                                         |                                                                                           |                                                                                                                               |
| PM <sub>10</sub> 2001                                         | <b>1.25 [1.14;1.37]</b>                 | <b>1.13 [1.01;1.25]</b>                                                                   | <b>1.12 [1.01;1.25]</b>                                                                                                       |
| <b>Cardiovascular mortality: Coronary heart disease (CHD)</b> |                                         |                                                                                           |                                                                                                                               |
| PM <sub>10</sub> 2001                                         | <b>1.36 [1.21;1.53]</b>                 | <b>1.21 [1.05;1.4]</b>                                                                    | <b>1.21 [1.05;1.39]</b>                                                                                                       |
| <b>Cardiovascular mortality: Stroke</b>                       |                                         |                                                                                           |                                                                                                                               |
| PM <sub>10</sub> 2001                                         | 0.85 [0.63;1.15]                        | 0.86 [0.60;1.22]                                                                          | 0.84 [0.59;1.20]                                                                                                              |
| <b>Respiratory mortality</b>                                  |                                         |                                                                                           |                                                                                                                               |
| PM <sub>10</sub> 2001                                         | <b>1.55 [1.35;1.77]</b>                 | <b>1.23 [1.05;1.45]</b>                                                                   | <b>1.22 [1.04;1.44]</b>                                                                                                       |
| <b>Respiratory mortality: Infectious disease</b>              |                                         |                                                                                           |                                                                                                                               |
| PM <sub>10</sub> 2001                                         | <b>1.35 [1.11;1.64]</b>                 | 1.17 [0.92;1.49]                                                                          | <b>1.16 [0.91;1.47]</b>                                                                                                       |
| <b>Respiratory mortality: COPD</b>                            |                                         |                                                                                           |                                                                                                                               |
| PM <sub>10</sub> 2001                                         | <b>1.83 [1.49;2.24]</b>                 | <b>1.32 [1.04;1.68]</b>                                                                   | <b>1.31 [1.03;1.68]</b>                                                                                                       |
| <b>Lung cancer</b>                                            |                                         |                                                                                           |                                                                                                                               |
| PM <sub>10</sub> 2001                                         | <b>1.98 [1.65;2.38]</b>                 | <b>1.60 [1.29;1.99]</b>                                                                   | -                                                                                                                             |

Source: ONS Longitudinal Study (Authors' own work)

Figure B1: Logistic regression odds ratios<sup>1</sup> [95% CI] per 10 µg/m<sup>3</sup> for PM<sub>10</sub> exposure in 2001 and mortality 2002-9 stratified by highest and lowest BS tertiles

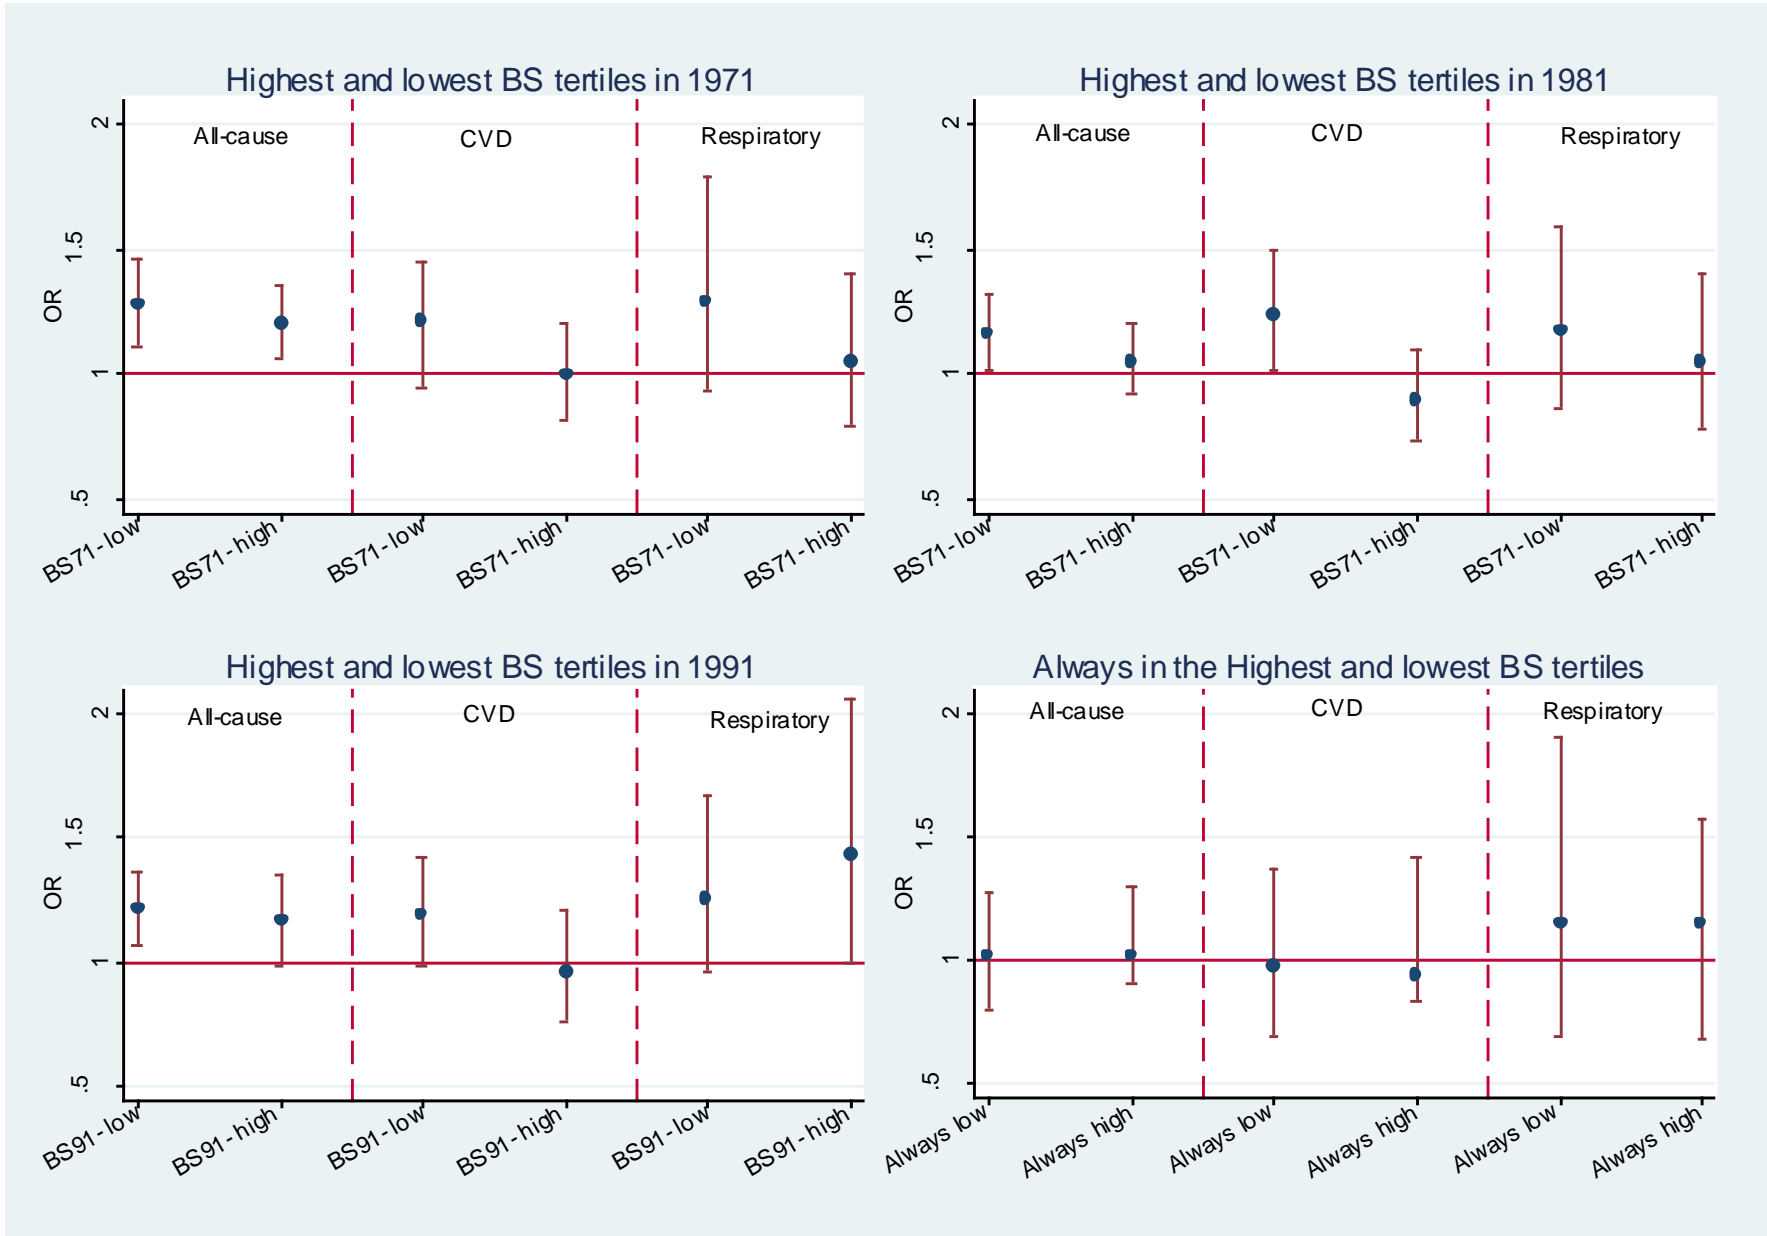

<sup>1</sup>Adjusted for sex, age, social class, area-level deprivation, region & population density. Source: ONS Longitudinal Study (Authors' own work)

Appendix C: SO<sub>2</sub> Results

Figure C1: Logistic regression odds ratios (95% CI) per 10 µg/m<sup>3</sup> for SO<sub>2</sub> exposure in 1971, 1981 and 1991 and mortality in subsequent decades<sup>1</sup>

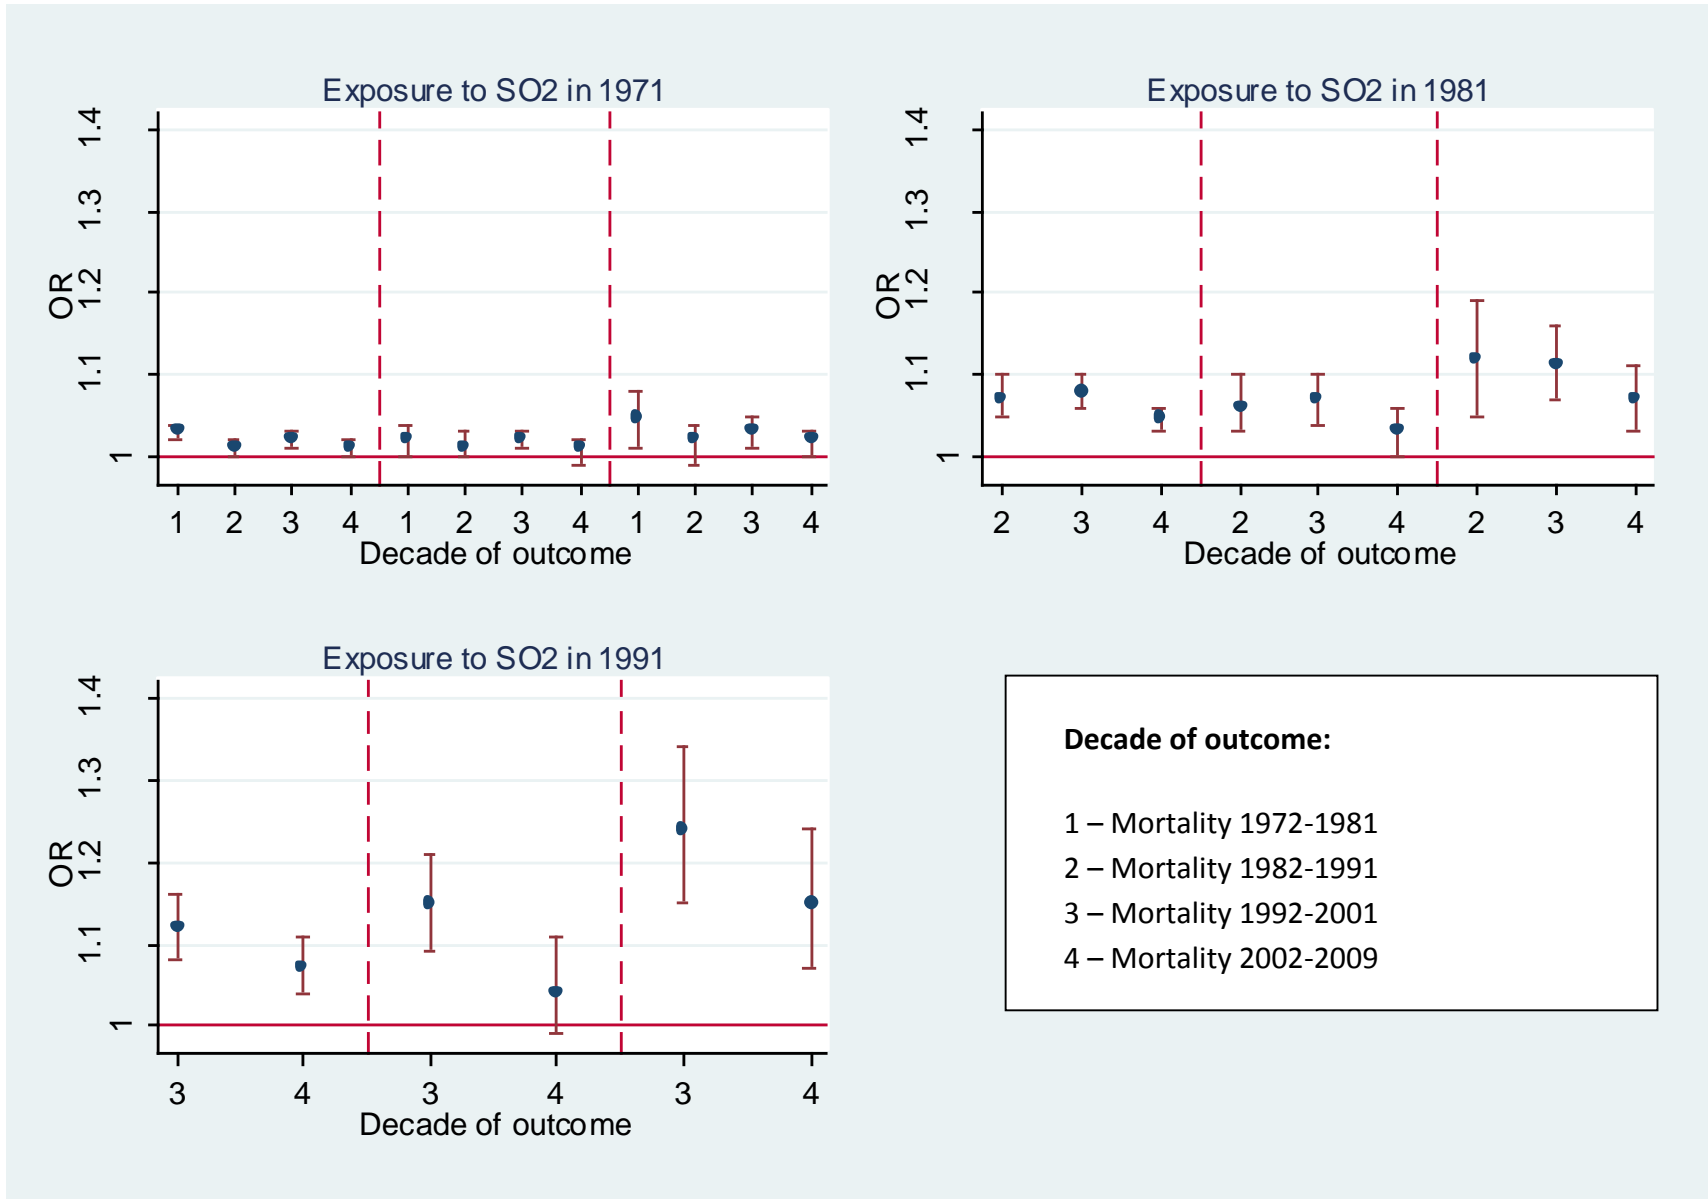

<sup>1</sup>Adjusted for for age and sex, social class of individual and area, population density and geographical region. Source: ONS Longitudinal Study (Authors' own work)

**Table C1: Logistic regression odds ratios (95% CI) per 10 µg/m<sup>3</sup> for SO<sub>2</sub> exposure in 1971, 1981 and 1991 and mortality in subsequent decades.**

| <b>Decade of outcome</b>                                      | <b>i) Unadjusted (age and sex only)</b> | <b>ii) Adjusted (age, sex, social class, area-level deprivation, region, pop density)</b> | <b>Sensitivity analysis: Adjusted (age, sex, social class, area-level deprivation, region, pop density &amp; lung cancer)</b> |
|---------------------------------------------------------------|-----------------------------------------|-------------------------------------------------------------------------------------------|-------------------------------------------------------------------------------------------------------------------------------|
| <b>Exposure in 1971</b>                                       |                                         |                                                                                           |                                                                                                                               |
| <b>All-cause mortality excluding accidents</b>                |                                         |                                                                                           |                                                                                                                               |
| 1972-2009                                                     | 1.04 [1.03;1.04]                        | 1.02 [1.01;1.02]                                                                          | -                                                                                                                             |
| 1972-1981                                                     | 1.04 [1.03;1.05]                        | 1.03 [1.02;1.04]                                                                          | -                                                                                                                             |
| 1982-1991                                                     | 1.04 [1.03;1.05]                        | 1.01 [1.01;1.02]                                                                          | -                                                                                                                             |
| 1992-2001                                                     | 1.04 [1.03;1.04]                        | 1.02 [1.01;1.03]                                                                          | -                                                                                                                             |
| 2002-2009                                                     | 1.02 [1.02;1.03]                        | 1.01 [1.01;1.02]                                                                          | 1.01 [1.00;1.02]                                                                                                              |
| <b>Cardiovascular mortality</b>                               |                                         |                                                                                           |                                                                                                                               |
| 1972-2009                                                     | 1.03 [1.03;1.04]                        | 1.01 [1.01;1.02]                                                                          | -                                                                                                                             |
| 1972-1981                                                     | 1.04 [1.03;1.05]                        | 1.02 [1.00;1.04]                                                                          | -                                                                                                                             |
| 1982-1991                                                     | 1.03 [1.03;1.04]                        | 1.01 [1.00;1.03]                                                                          | -                                                                                                                             |
| 1992-2001                                                     | 1.03 [1.02;1.04]                        | 1.02 [1.01;1.03]                                                                          | -                                                                                                                             |
| 2002-2009                                                     | 1.02 [1.01;1.03]                        | 1.01 [0.99;1.02]                                                                          | 1.00 [0.99;1.01]                                                                                                              |
| <b>Cardiovascular mortality: Coronary heart disease (CHD)</b> |                                         |                                                                                           |                                                                                                                               |
| 1972-2009                                                     | 1.03 [1.03;1.04]                        | 1.02 [1.01;1.03]                                                                          | -                                                                                                                             |
| 1972-1981                                                     | 1.03 [1.02;1.05]                        | 1.02 [1.01;1.04]                                                                          | -                                                                                                                             |
| 1982-1991                                                     | 1.03 [1.02;1.04]                        | 1.01 [1.00;1.03]                                                                          | -                                                                                                                             |
| 1992-2001                                                     | 1.03 [1.03;1.04]                        | 1.02 [1.01;1.03]                                                                          | -                                                                                                                             |
| 2002-2009                                                     | 1.03 [1.02;1.03]                        | 1.01 [0.99;1.02]                                                                          | 1.01 [0.99;1.02]                                                                                                              |
| <b>Cardiovascular mortality: Stroke</b>                       |                                         |                                                                                           |                                                                                                                               |
| 1972-2009                                                     | 1.02 [1.01;1.03]                        | 1.02 [1.00;1.03]                                                                          | -                                                                                                                             |
| 1972-1981                                                     | 1.03 [1.01;1.04]                        | 1.01 [0.98;1.04]                                                                          | -                                                                                                                             |
| 1982-1991                                                     | 1.02 [1.01;1.04]                        | 1.00 [0.98;1.03]                                                                          | -                                                                                                                             |
| 1992-2001                                                     | 1.02 [1.01;1.03]                        | 1.02 [1.00;1.04]                                                                          | -                                                                                                                             |
| 2002-2009                                                     | 1.00 [0.98;1.02]                        | 1.02 [0.98;1.06]                                                                          | 1.01 [0.97;1.04]                                                                                                              |
| <b>Respiratory mortality</b>                                  |                                         |                                                                                           |                                                                                                                               |
| 1972-2009                                                     | 1.05 [1.04;1.06]                        | 1.03 [1.01;1.04]                                                                          | -                                                                                                                             |
| 1972-1981                                                     | 1.05 [1.03;1.07]                        | 1.05 [1.01;1.08]                                                                          | -                                                                                                                             |
| 1982-1991                                                     | 1.06 [1.04;1.07]                        | 1.02 [0.99;1.04]                                                                          | -                                                                                                                             |
| 1992-2001                                                     | 1.05 [1.04;1.06]                        | 1.03 [1.01;1.05]                                                                          | -                                                                                                                             |
| 2002-2009                                                     | 1.04 [1.03;1.05]                        | 1.02 [1.00;1.03]                                                                          | 1.01 [0.99;1.03]                                                                                                              |
| <b>Respiratory mortality: Respiratory Infections</b>          |                                         |                                                                                           |                                                                                                                               |
| 1972-2009                                                     | 1.04 [1.03;1.05]                        | 1.03 [1.01;1.05]                                                                          | -                                                                                                                             |
| 1972-1981                                                     | 1.05 [1.03;1.07]                        | 1.06 [1.02;1.11]                                                                          | -                                                                                                                             |
| 1982-1991                                                     | 1.04 [1.02;1.07]                        | 1.01 [0.97;1.06]                                                                          | -                                                                                                                             |
| 1992-2001                                                     | 1.05 [1.03;1.06]                        | 1.03 [1.01;1.06]                                                                          | -                                                                                                                             |
| 2002-2009                                                     | 1.03 [1.01;1.04]                        | 1.02 [0.99;1.04]                                                                          | 1.01 [0.98;1.03]                                                                                                              |
| <b>Respiratory mortality: COPD</b>                            |                                         |                                                                                           |                                                                                                                               |
| 1972-2009                                                     | 1.06 [1.05;1.07]                        | 1.03 [1.01;1.04]                                                                          | -                                                                                                                             |
| 1972-1981                                                     | 1.06 [1.03;1.08]                        | 1.04 [0.99;1.09]                                                                          | -                                                                                                                             |
| 1982-1991                                                     | 1.06 [1.04;1.08]                        | 1.01 [0.98;1.04]                                                                          | -                                                                                                                             |
| 1992-2001                                                     | 1.06 [1.04;1.07]                        | 1.03 [1.01;1.05]                                                                          | -                                                                                                                             |
| 2002-2009                                                     | 1.06 [1.04;1.07]                        | 1.03 [1.01;1.05]                                                                          | 1.02 [1.00;1.05]                                                                                                              |
| <b>Lung cancer mortality</b>                                  |                                         |                                                                                           |                                                                                                                               |
| 1972-2009                                                     | 1.07 [1.06;1.07]                        | 1.04 [1.02;1.05]                                                                          | -                                                                                                                             |
| 1972-1981                                                     | 1.07 [1.05;1.09]                        | 1.04 [1.01;1.07]                                                                          | -                                                                                                                             |
| 1982-1991                                                     | 1.08 [1.06;1.09]                        | 1.05 [1.03;1.07]                                                                          | -                                                                                                                             |
| 1992-2001                                                     | 1.06 [1.05;1.07]                        | 1.03 [1.01;1.05]                                                                          | -                                                                                                                             |
| 2002-2009                                                     | 1.05 [1.04;1.07]                        | 1.03 [1.01;1.05]                                                                          | -                                                                                                                             |

| Exposure in 1981                                              |                  |                  |                  |
|---------------------------------------------------------------|------------------|------------------|------------------|
| <b>All-cause mortality excluding accidents</b>                |                  |                  |                  |
| 1982-2009                                                     | 1.09 [1.08;1.10] | 1.07 [1.05;1.08] | -                |
| 1982-1991                                                     | 1.10 [1.09;1.12] | 1.07 [1.05;1.10] | -                |
| 1992-2001                                                     | 1.10 [1.08;1.11] | 1.08 [1.06;1.10] | -                |
| 2002-2009                                                     | 1.07 [1.05;1.08] | 1.05 [1.03;1.06] | 1.04 [1.02;1.06] |
| <b>Cardiovascular mortality</b>                               |                  |                  |                  |
| 1982-2009                                                     | 1.08 [1.06;1.09] | 1.06 [1.04;1.08] | -                |
| 1982-1991                                                     | 1.08 [1.06;1.10] | 1.06 [1.03;1.10] | -                |
| 1992-2001                                                     | 1.08 [1.06;1.10] | 1.07 [1.04;1.10] | -                |
| 2002-2009                                                     | 1.05 [1.03;1.07] | 1.03 [1.00;1.06] | 1.03 [1.00;1.05] |
| <b>Cardiovascular mortality: Coronary heart disease (CHD)</b> |                  |                  |                  |
| 1982-2009                                                     | 1.08 [1.07;1.10] | 1.06 [1.04;1.09] | -                |
| 1982-1991                                                     | 1.08 [1.05;1.11] | 1.07 [1.03;1.11] | -                |
| 1992-2001                                                     | 1.08 [1.06;1.11] | 1.07 [1.04;1.10] | -                |
| 2002-2009                                                     | 1.07 [1.04;1.09] | 1.04 [1.01;1.08] | 1.04 [1.00;1.08] |
| <b>Cardiovascular mortality: Stroke</b>                       |                  |                  |                  |
| 1982-2009                                                     | 1.05 [1.02;1.07] | 1.04 [1.01;1.08] | -                |
| 1982-1991                                                     | 1.05 [1.00;1.09] | 1.01 [0.96;1.07] | -                |
| 1992-2001                                                     | 1.06 [1.02;1.09] | 1.06 [1.01;1.11] | -                |
| 2002-2009                                                     | 1.00 [0.95;1.07] | 1.04 [0.96;1.13] | 1.02 [0.94;1.11] |
| <b>Respiratory mortality</b>                                  |                  |                  |                  |
| 1982-2009                                                     | 1.14 [1.11;1.15] | 1.10 [1.07;1.13] | -                |
| 1982-1991                                                     | 1.16 [1.11;1.21] | 1.12 [1.05;1.19] | -                |
| 1992-2001                                                     | 1.14 [1.11;1.17] | 1.11 [1.07;1.16] | -                |
| 2002-2009                                                     | 1.10 [1.07;1.13] | 1.07 [1.03;1.11] | 1.06 [1.02;1.10] |
| <b>Respiratory mortality: Respiratory Infections</b>          |                  |                  |                  |
| 1982-2009                                                     | 1.12 [1.09;1.15] | 1.09 [1.04;1.13] | -                |
| 1982-1991                                                     | 1.14 [1.06;1.22] | 1.10 [1.00;1.22] | -                |
| 1992-2001                                                     | 1.15 [1.11;1.19] | 1.12 [1.07;1.18] | -                |
| 2002-2009                                                     | 1.05 [1.01;1.10] | 1.04 [0.99;1.11] | 1.03 [0.97;1.09] |
| <b>Respiratory mortality: COPD</b>                            |                  |                  |                  |
| 1982-2009                                                     | 1.16 [1.13;1.19] | 1.14 [1.09;1.18] | -                |
| 1982-1991                                                     | 1.17 [1.12;1.24] | 1.12 [1.04;1.21] | -                |
| 1992-2001                                                     | 1.15 [1.11;1.20] | 1.13 [1.07;1.19] | -                |
| 2002-2009                                                     | 1.16 [1.12;1.21] | 1.14 [1.08;1.21] | 1.14 [1.07;1.21] |
| <b>Lung cancer mortality</b>                                  |                  |                  |                  |
| 1982-2009                                                     | 1.17 [1.14;1.19] | 1.11 [1.08;1.15] | -                |
| 1982-1991                                                     | 1.20 [1.15;1.25] | 1.13 [1.07;1.19] | -                |
| 1992-2001                                                     | 1.14 [1.10;1.18] | 1.10 [1.04;1.15] | -                |
| 2002-2009                                                     | 1.14 [1.10;1.19] | 1.11 [1.05;1.17] | -                |
| Exposure in 1991                                              |                  |                  |                  |
| <b>All-cause mortality excluding accidents</b>                |                  |                  |                  |
| 1992-2009                                                     | 1.16 [1.14;1.19] | 1.10 [1.07;1.13] | -                |
| 1992-2001                                                     | 1.20 [1.17;1.23] | 1.12 [1.08;1.16] | -                |
| 2002-2009                                                     | 1.13 [1.10;1.16] | 1.07 [1.04;1.11] | 1.07 [1.03;1.11] |
| <b>Cardiovascular mortality</b>                               |                  |                  |                  |
| 1992-2009                                                     | 1.18 [1.15;1.21] | 1.09 [1.05;1.14] | -                |
| 1992-2001                                                     | 1.23 [1.19;1.27] | 1.15 [1.09;1.21] | -                |
| 2002-2009                                                     | 1.12 [1.08;1.16] | 1.04 [0.99;1.10] | 1.04 [0.99;1.09] |
| <b>Cardiovascular mortality: Coronary heart disease (CHD)</b> |                  |                  |                  |
| 1992-1991                                                     | 1.24 [1.20;1.28] | 1.13 [1.07;1.18] | -                |
| 1992-2001                                                     | 1.28 [1.23;1.33] | 1.17 [1.11;1.25] | -                |
| 2002-2009                                                     | 1.18 [1.13;1.23] | 1.07 [1.00;1.15] | 1.07 [1.00;1.15] |

|                                                      |                         |                         |                         |
|------------------------------------------------------|-------------------------|-------------------------|-------------------------|
| <b>Cardiovascular mortality: Stroke</b>              |                         |                         |                         |
| 1992-1991                                            | <b>1.15 [1.09;1.22]</b> | <b>1.11 [1.03;1.21]</b> | -                       |
| 1992-2001                                            | <b>1.18 [1.11;1.26]</b> | <b>1.14 [1.04;1.25]</b> | -                       |
| 2002-2009                                            | 1.05 [0.94;1.17]        | 1.04 [0.88;1.22]        | 1.03 [0.87;1.22]        |
| <b>Respiratory mortality</b>                         |                         |                         |                         |
| 1992-2009                                            | <b>1.26 [1.21;1.31]</b> | <b>1.19 [1.12;1.26]</b> | -                       |
| 1992-2001                                            | <b>1.28 [1.21;1.35]</b> | <b>1.24 [1.15;1.34]</b> | -                       |
| 2002-2009                                            | <b>1.23 [1.17;1.30]</b> | <b>1.15 [1.07;1.24]</b> | <b>1.14 [1.05;1.23]</b> |
| <b>Respiratory mortality: Respiratory Infections</b> |                         |                         |                         |
| 1992-2009                                            | <b>1.17 [1.11;1.24]</b> | <b>1.13 [1.04;1.23]</b> | -                       |
| 1992-2001                                            | <b>1.22 [1.14;1.31]</b> | <b>1.22 [1.10;1.36]</b> | -                       |
| 2002-2009                                            | <b>1.11 [1.03;1.20]</b> | 1.05 [0.94;1.17]        | 1.03 [0.92;1.16]        |
| <b>Respiratory mortality: COPD</b>                   |                         |                         |                         |
| 1992-2009                                            | <b>1.36 [1.29;1.44]</b> | <b>1.31 [1.20;1.42]</b> | -                       |
| 1992-2001                                            | <b>1.37 [1.28;1.48]</b> | <b>1.30 [1.16;1.45]</b> | -                       |
| 2002-2009                                            | <b>1.34 [1.24;1.45]</b> | <b>1.31 [1.17;1.47]</b> | <b>1.31 [1.16;1.47]</b> |
| <b>Lung cancer mortality</b>                         |                         |                         |                         |
| 1992-2009                                            | <b>1.31 [1.25;1.37]</b> | <b>1.18 [1.10;1.27]</b> | -                       |
| 1992-2001                                            | <b>1.32 [1.24;1.41]</b> | <b>1.16 [1.05;1.27]</b> | -                       |
| 2002-2009                                            | <b>1.30 [1.21;1.40]</b> | <b>1.21 [1.09;1.34]</b> | -                       |

Source: ONS Longitudinal Study (Authors' own work)

Figure C2: Logistic regression odds ratios (95% CI) per 10  $\mu\text{g}/\text{m}^3$  for  $\text{SO}_2$  exposure in 1971, 1981 and 1991 and mortality in each subsequent decade<sup>1</sup>

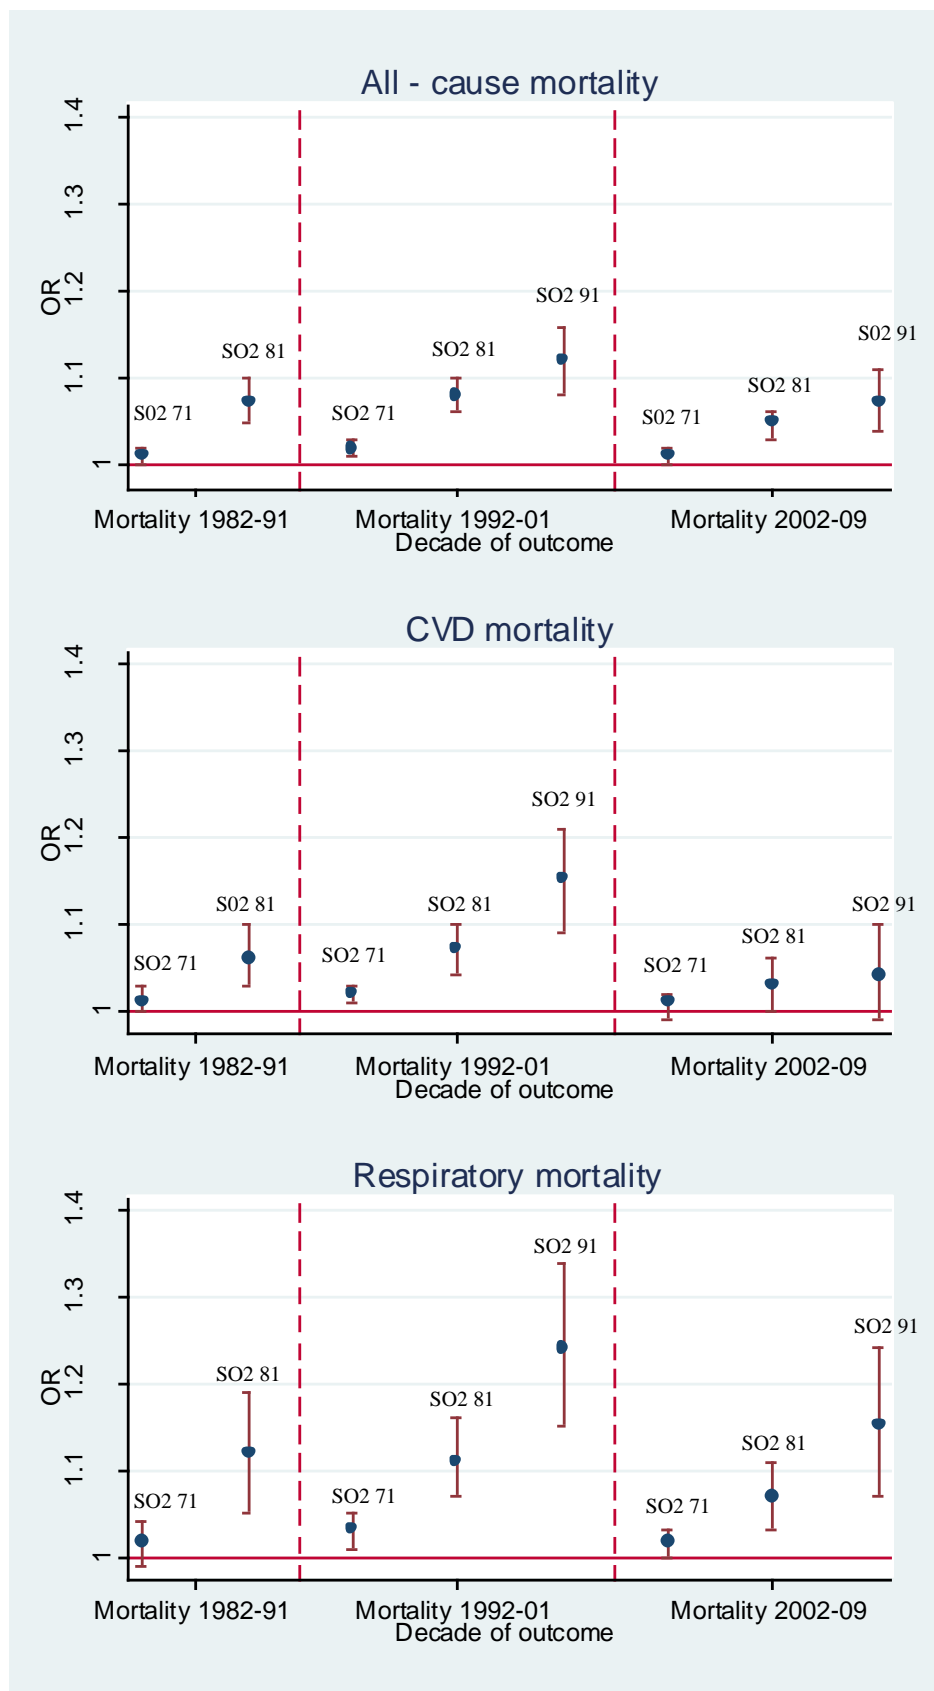

<sup>1</sup>Adjusted for for age and sex, social class of individual and area, population density and geographical region. Source: ONS Longitudinal Study (Authors' own work)

Figure C3: Logistic regression odds ratios<sup>1</sup> [95% CI] per 10 µg/m<sup>3</sup> for PM<sub>10</sub> exposure in 2001 and mortality 2002-9 stratified by highest and lowest SO<sub>2</sub> tertiles

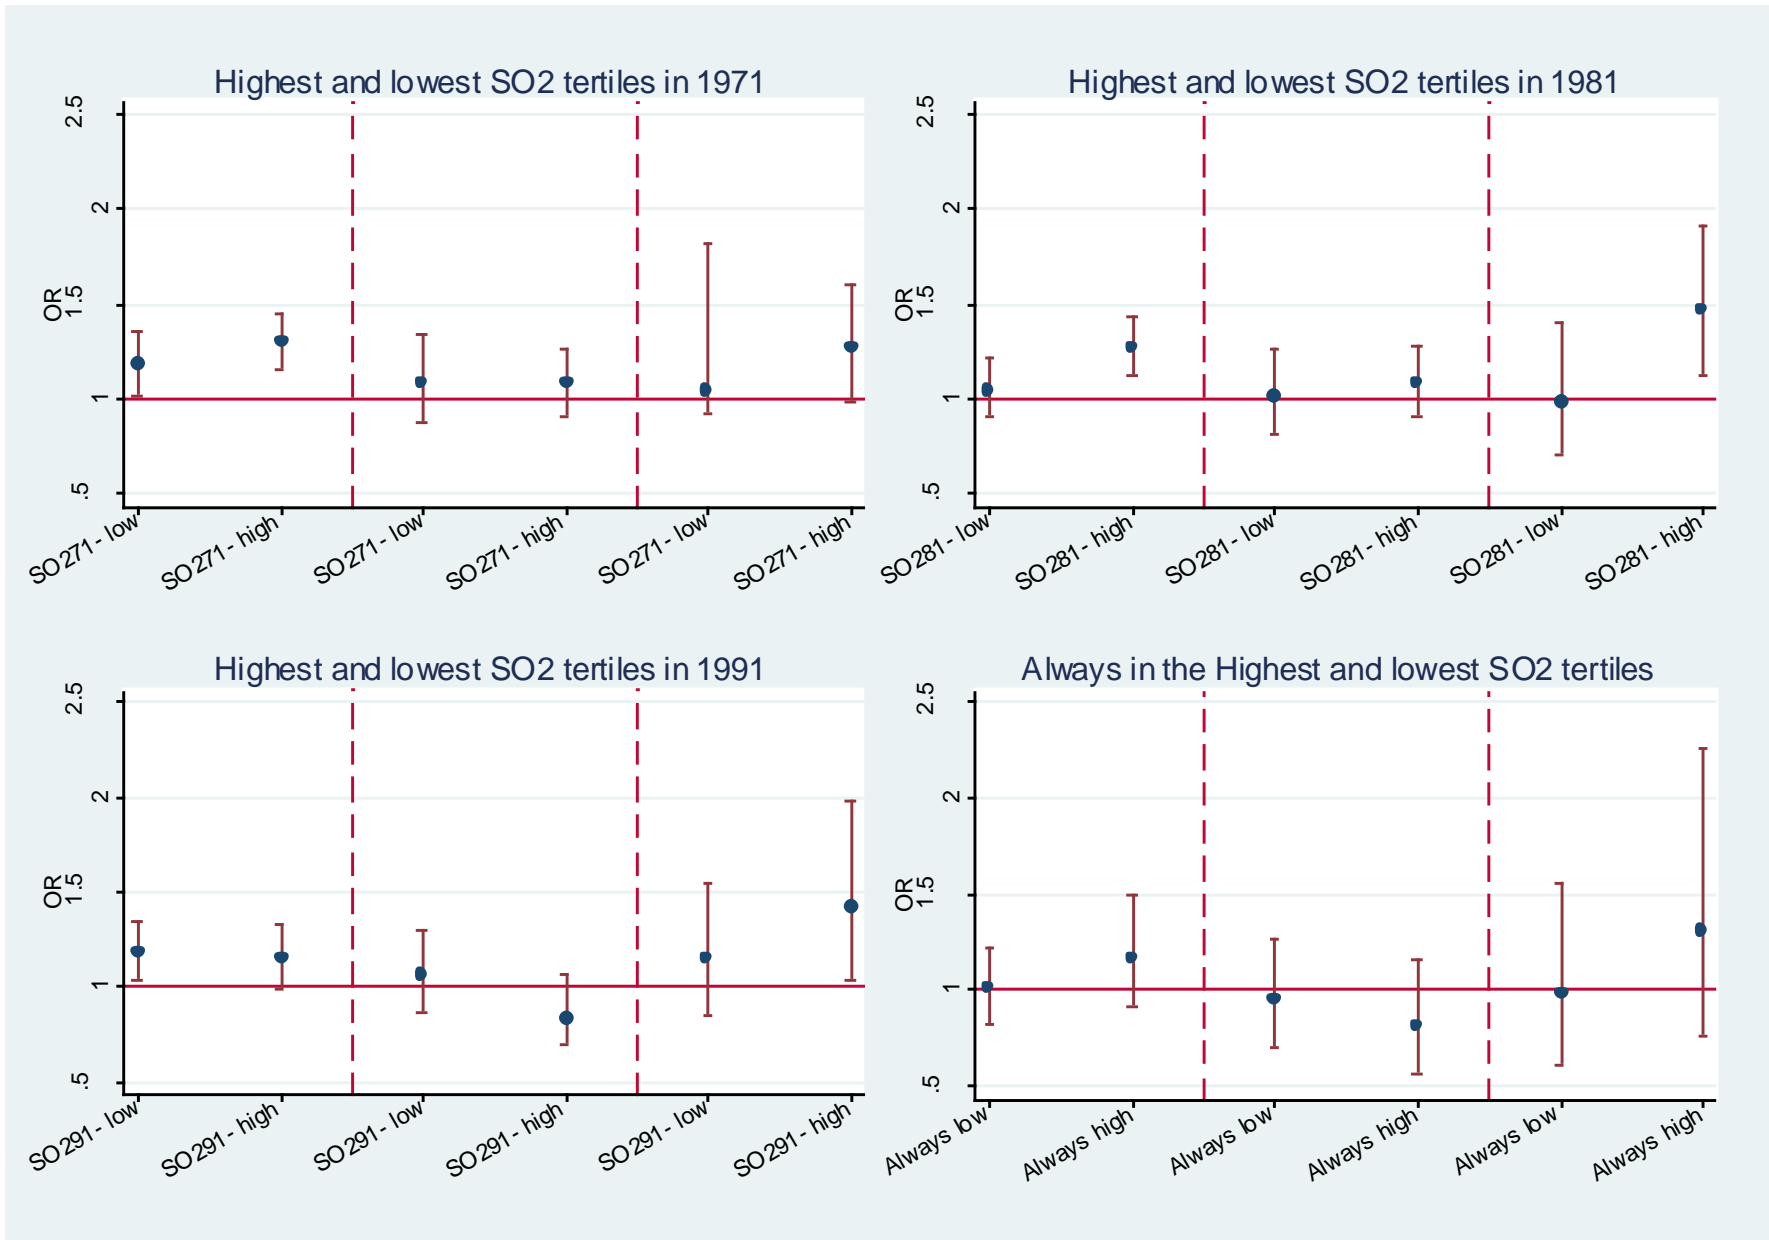

<sup>1</sup>Adjusted for sex, age, social class, area-level deprivation, region, & population density. Source: ONS Longitudinal Study (Authors' own work)



Figure C4: Concentration-response for tertiles of SO<sub>2</sub> exposure in 1971 and subsequent mortality 1971 – 2009 for all-cause, CVD and respiratory mortality

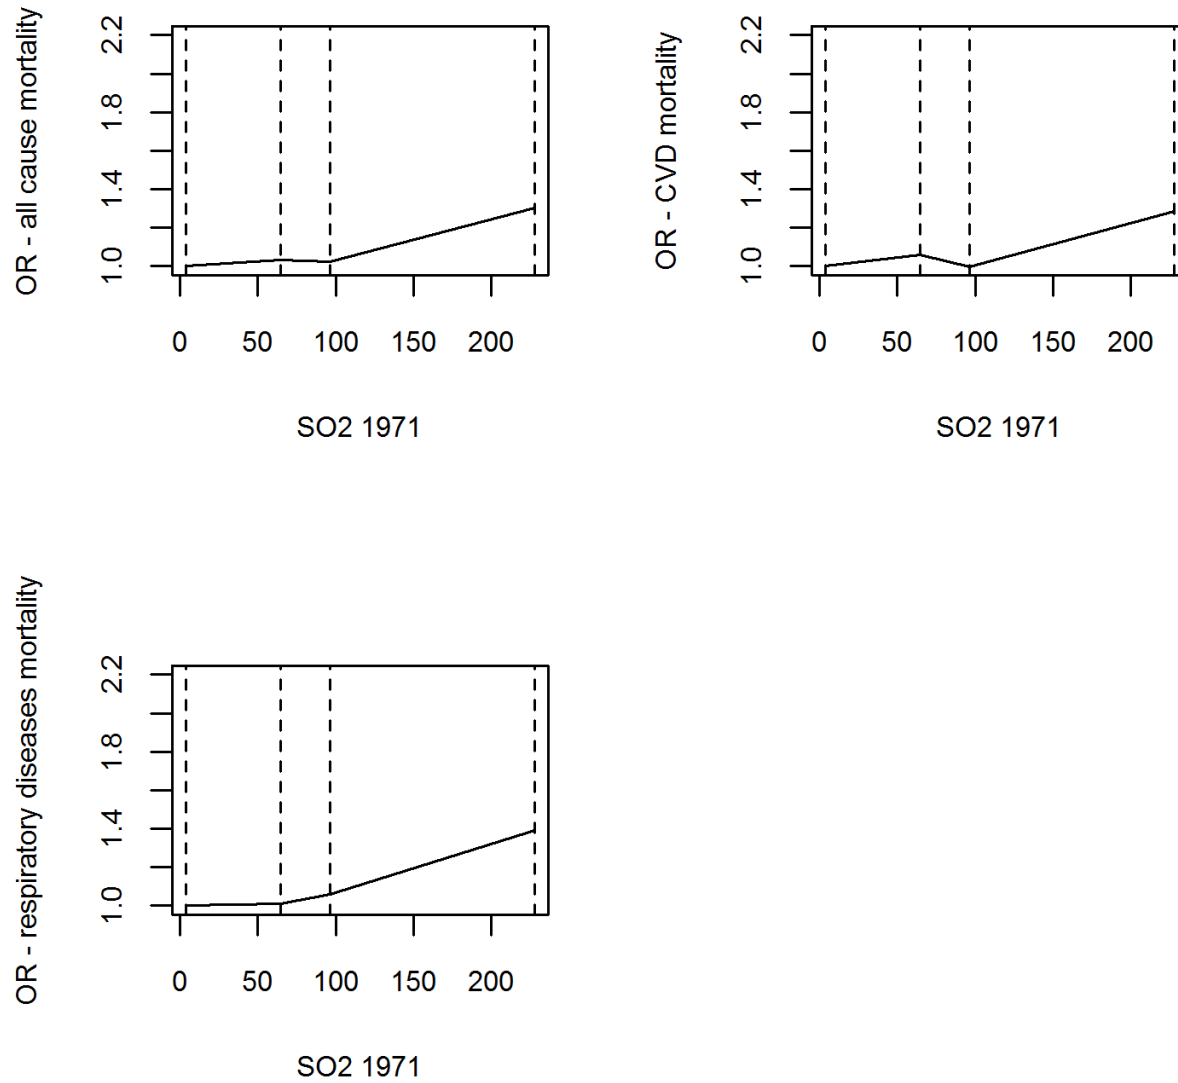

<sup>1</sup>Adjusted for sex, age, social class, area-level deprivation, region & population density. Source: ONS Longitudinal Study (Authors' own work)
